# Supplementary material for: Mechanisms of response of rare and abundant species in rhizosphere soils of Coriaria nepalensis Wall. to heavy metal remediation of lead-zinc tailings
Source: Research Square preprint supplement (doi:10.21203/rs.3.rs-7322621/v1), 2025-08-22
Supplement: Supplementary file 1 [file 5a884f5c6b2a6b598653e341.docx]

**Mechanisms of response of rare and abundant species in rhizosphere soils of *Coriaria nepalensis Wall.* to heavy metal remediation of lead-zinc tailings**

Sixi Zhu*, Xianwang Du, Suxia Sun, Wei Zhao, Yutian Lv, Junwei Zhang

(College of Eco-environment Engineering, Guizhou Minzu University; The Karst Environmental Geological Hazard Prevention of Key Laboratory of State Ethnic Affairs Commission, Guiyang 550025, China.)

Corresponding author: Sixi Zhu

**
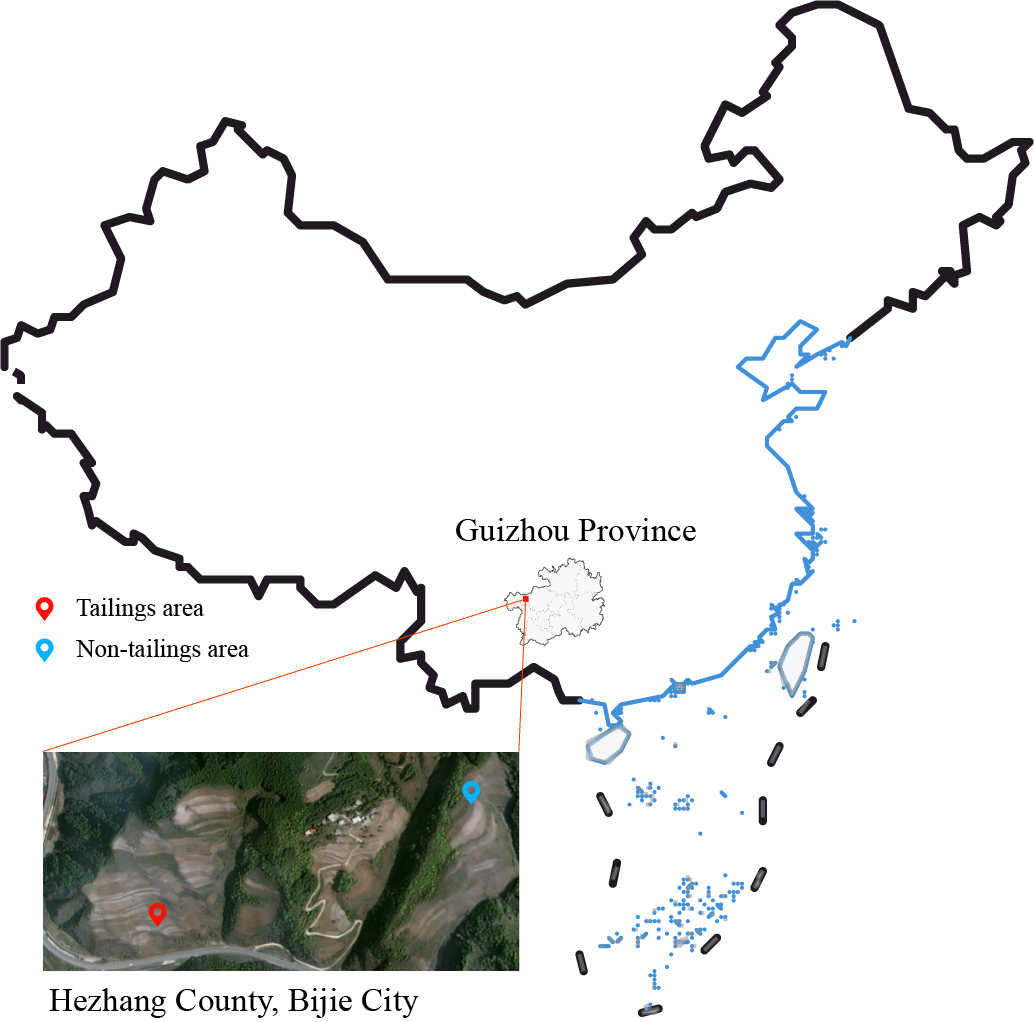
**

**Figure S1.** The sampling sites included tailings and non-tailings areas. The lead-zinc tailing area in Hezhang County, Bijie City, Guizhou Province, was selected for this study. Red marks indicate tailings areas, while blue marks indicate non-tailings areas.

**
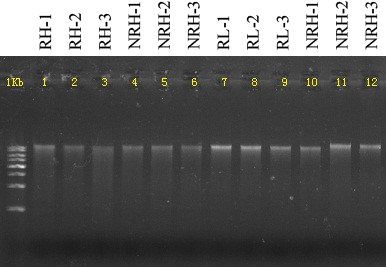
**

**Figure S2.** The full, uncropped gel and blot images. RH, RL, NRH and NRL represent rhizosphere soil of tailings areas, rhizosphere soil of non-tailings areas, non-rhizosphere soil of tailings areas and non-rhizosphere soil of non-tailings areas, respectively.

**
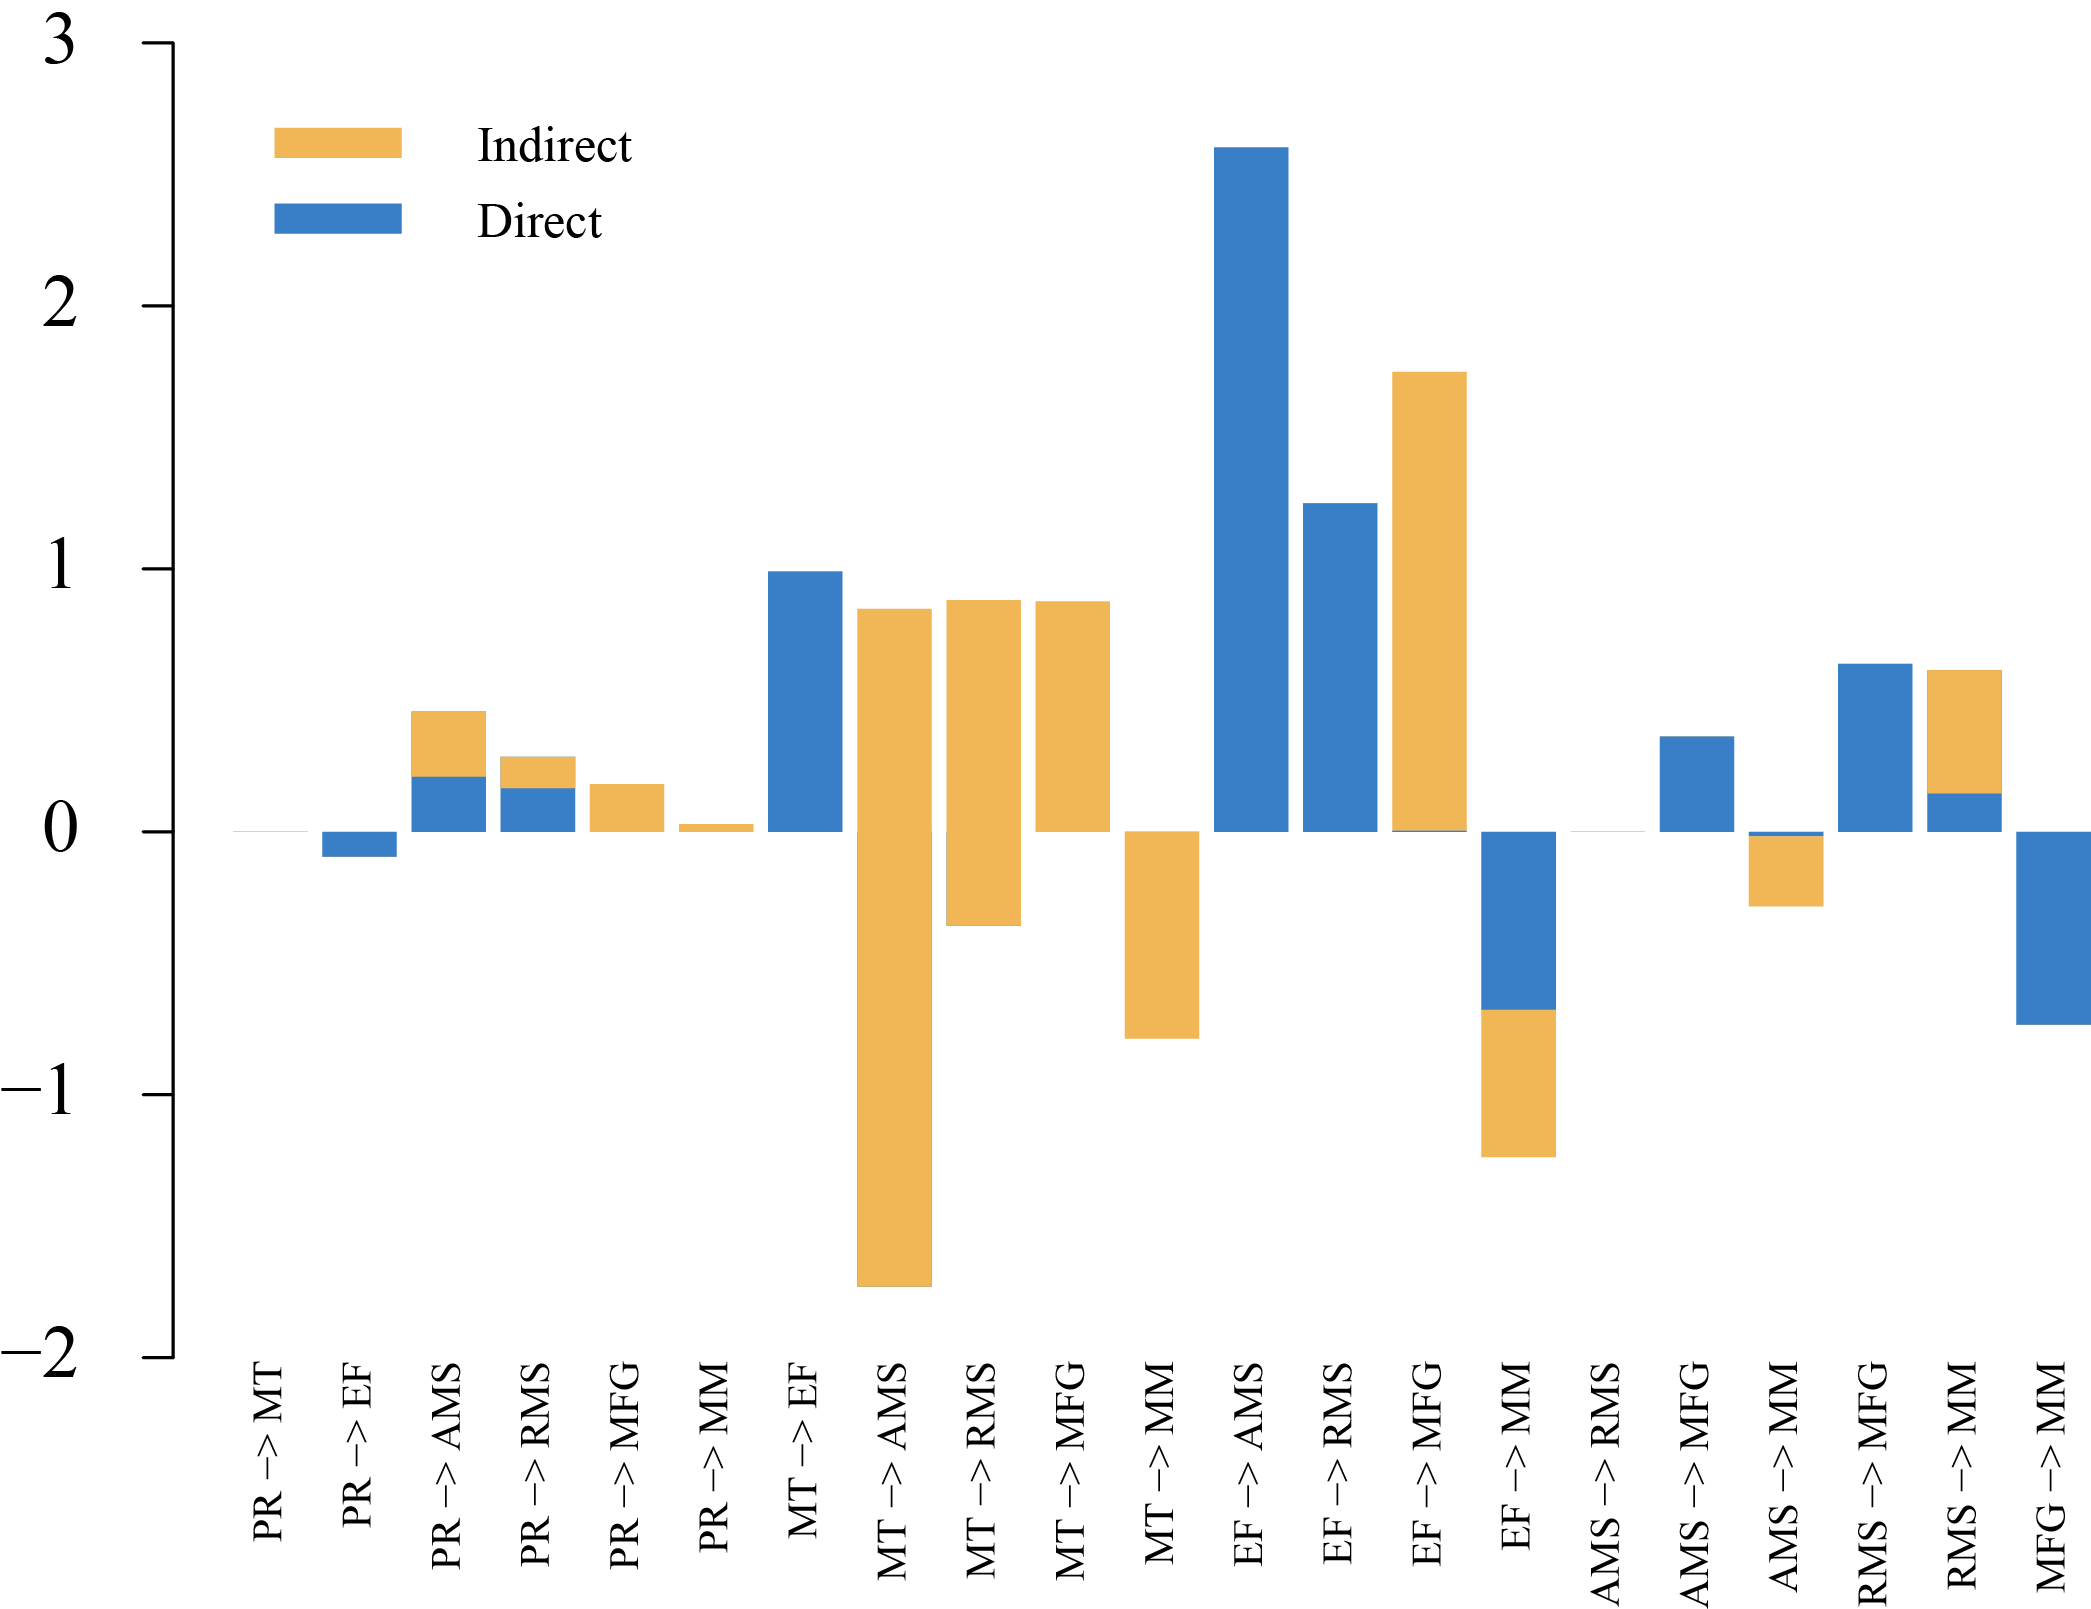
**

**Figure S3.** Direct and indirect effects between modules were analyzed using structural equation modeling. The abbreviations used are as follows: PR for Plant rhizosphere, MT for Metal tailings, EF for Environmental factors, AMS for Abundant microbial species, RMS for Rare microbial species, MFG for Microbial functional genes, and MM for Microbial metabolites.

**Table S1.** Screening of environmental factors by Variance Inflation Factor (VIF) analysis

|  | As | Cr | Zn | pH | NH4 | N03 | SOM | TP |
| --- | --- | --- | --- | --- | --- | --- | --- | --- |
| VIF | 9.442554 | 4.003223 | 7.860157 | 3.488524 | 7.337254 | 3.616198 | 5.307721 | 2.803297 |

The larger the VIF value, the more severe the multicollinearity among the independent variables. We set a VIF threshold of 10 and considered environmental factors with VIF values greater than 10 to be unreliable. These factors were filtered out and the remaining factors were screened repeatedly until all selected environmental factors had VIF values less than 10.
