# Supplementary material for: Mechanisms of response of rare and abundant species in rhizosphere soils of Coriaria nepalensis Wall. to heavy metal remediation of lead-zinc tailings
Source: Research Square preprint supplement (doi:10.21203/rs.3.rs-7322621/v1), 2025-08-22
Supplement: Supplementary file 2 [file fd66baaa9953c3fad56e4aff.xlsx]

## Sheet: Sheet1
Table S2 Critical nodes in covariance network analysis
Nitrogen cycling				Phosphuros cycling				Sulfur cycling				Carbon decomposition				Carbon fixation				Plant growth promotion				Metal(loid) resistance
Abundant microbial species		Rare microbial species		Abundant microbial species		Rare microbial species		Abundant microbial species		Rare microbial species		Abundant microbial species		Rare microbial species		Abundant microbial species		Rare microbial species		Abundant microbial species		Rare microbial species		Abundant microbial species		Rare microbial species
Node name	weighted degree	Node name	weighted degree	Node name	weighted degree	Node name	weighted degree	Node name	weighted degree	Node name	weighted degree	Node name	weighted degree	Node name	weighted degree	Node name	weighted degree	Node name	weighted degree	Node name	weighted degree	Node name	weighted degree	Node name	weighted degree	Node name	weighted degree
nirB	30	(R)-Glabridin	25	(R)-Glabridin	31	surE	22	(R)-Glabridin	22	Desglucocheirotoxin	20	CRYZ	36	glgB	29	pps	47	metF, MTHFR	27	(R)-Glabridin	29	(R)-Glabridin	24	Riboprine	27	chrA	26
nrtC	30	nirB	25	Riboprine	30	(R)-Glabridin	21	sseA	22	(R)-Glabridin	20	glgP	36	(R)-Glabridin	27	fhs	46	(R)-Glabridin	24	Riboprine	26	cheB	24	(R)-Glabridin	27	(R)-Glabridin	25
glnA	29	Riboprine	24	ppx-gppA	29	Riboprine	20	cysI	22	Riboprine	19	treS	36	Riboprine	26	por	46	Riboprine	22	Desglucocheirotoxin	26	Riboprine	23	czcA	27	czcD	25
gltD	29	ureC	24	appA	29	ppk1	19	sqr	22	soxB	18	malZ	36	aceB	26	K15052	45	E2.2.1.1	22	cheA	26	mcp	22	zntA	27	czcS	25
nasA	29	Desglucocheirotoxin	23	Desglucocheirotoxin	28	ppx-gppA	19	Riboprine	21	Aucubin	17	aceA	36	malZ	25	korD	45	fhs	22	motB	26	motB	22	czcC	27	Riboprine	24
(R)-Glabridin	28	gltD	21	phoU	28	Desglucocheirotoxin	18	cysH	21	tmoF, tbuC, touF	17	GSR	36	GSR	25	(R)-Glabridin	44	mdh	21	flgG	26	flgD	22	czcB	27	czcA	24
ureC	28	gltB	20	ppk1	27	Aucubin	16	soxB	21	sseA	16	glgB	35	Desglucocheirotoxin	24	E2.2.1.1	44	MUT	21	cheB	25	Desglucocheirotoxin	21	chrR	27	czcB	24
Riboprine	27	nasA	20	phoR	27	phnF	16	Desglucocheirotoxin	20	N-Isobutyl-2,4,8,10,12-tetradecapentaenamide	15	nagZ	35	katG	24	ppc	44	GAPDH	20	cheR	25	cheR	21	lspA	26	pbrT	24
nirK	27	Aucubin	19	pstS	27	Cytosine deoxyribonucleoside	15	cysD	18	Dihydroceramide	15	IMS	34	sacC	24	sdhB	44	pps	20	ilvB3	24	Aucubin	18	czrB	25	Desglucocheirotoxin	23
nasA	27	Cytosine deoxyribonucleoside	19	glpQ	27	phoD	15	Aucubin	17	cysNC	15	katG	34	Aucubin	22	folD	44	Desglucocheirotoxin	19	mcp	24	flhA	18	Desglucocheirotoxin	24	chrR	22
napA	27	nasA	19	pstB	27	Prenyl glucoside	14	sorB	17	cysD	15	bglB	34	Cytosine deoxyribonucleoside	22	MUT	44	Prenyl glucoside	19	cheY	24	Cytosine deoxyribonucleoside	17	pbrT	24	czrA	22
Desglucocheirotoxin	26	N-Isobutyl-2,4,8,10,12-tetradecapentaenamide	16	pstC	27	Comfrey	13	Comfrey	16	Prenyl glucoside	14	malQ	33	K03791	22	fdhB	44	ALDO	19	Aucubin	23	cheY	17	ziaR	24	ziaR	22
gltB	26	Dihydroceramide	16	pstA	27	Jacobine N-Oxide	13	Prenyl glucoside	16	Cytosine deoxyribonucleoside	14	Riboprine	32	CAT	21	Riboprine	43	Comfrey	18	flhA	23	motA	17	CrrT	24	Aucubin	20
narH	25	Prenyl glucoside	16	ppnK	27	N-Oleoyl Glutamine	13	Cytosine deoxyribonucleoside	16	cysH	14	(R)-Glabridin	32	aceA	21	Desglucocheirotoxin	43	ACO	18	cheC	23	Prenyl glucoside	16	nmtR	24	zntA	20
Comfrey	24	narG	16	Aucubin	26	Baccatin III	13	cysNC	16	Comfrey	13	lytD	31	Prenyl glucoside	20	ACAT	42	sdhA	18	Cytosine deoxyribonucleoside	21	patA	16	fieF	23	nmtR	20
narG	24	nrtB	16	spoT	26	Salbutamol	13	N-Isobutyl-2,4,8,10,12-tetradecapentaenamide	15	Jacobine N-Oxide	13	Aucubin	30	ISA	20	ACO	42	Aucubin	17	motA	21	N-Isobutyl-2,4,8,10,12-tetradecapentaenamide	15	Aucubin	21	Cytosine deoxyribonucleoside	19
nosZ	24	narH	16	pyk	26	(5E,7E)-Undeca-2,5,7-trienedioylcarnitine	13	Dihydroceramide	15	N-Oleoyl Glutamine	13	Desglucocheirotoxin	30	E3.2.1.6	19	sdhA	42	Cytosine deoxyribonucleoside	17	flgD	21	Comfrey	15	Comfrey	20	N-Isobutyl-2,4,8,10,12-tetradecapentaenamide	18
Aucubin	23	NIT-6	15	surE	26	6-O-Desmethyl-mycophenolic acid	13	Chlorophyllide a	15	Baccatin III	13	Cytosine deoxyribonucleoside	29	NAGLU	17	accC	42	accC	16	N-Isobutyl-2,4,8,10,12-tetradecapentaenamide	19	Dihydroceramide	15	Prenyl glucoside	20	Dihydroceramide	18
Cytosine deoxyribonucleoside	22	Comfrey	14	Prenyl glucoside	25	N-Isobutyl-2,4,8,10,12-tetradecapentaenamide	12	Jacobine N-Oxide	14	Salbutamol	13	ISA	29	N-Isobutyl-2,4,8,10,12-tetradecapentaenamide	16	sucC	42	sdhB	16	Dihydroceramide	19	flgG	15	Cytosine deoxyribonucleoside	20	Prenyl glucoside	18
Chlorophyllide a	21	Bufuralol	13	phnF	25	Dihydroceramide	12	N-Oleoyl Glutamine	14	(5E,7E)-Undeca-2,5,7-trienedioylcarnitine	13	CAT	28	Comfrey	16	fumC	42	N-Isobutyl-2,4,8,10,12-tetradecapentaenamide	15	Prenyl glucoside	19	Acotiamide	14	nmtR	20	Comfrey	16
Prenyl glucoside	21	Jacobine N-Oxide	13	phoD	24	phoR	12	Salbutamol	14	6-O-Desmethyl-mycophenolic acid	13	Prenyl glucoside	27	Dihydroceramide	16	sucD	42	Dihydroceramide	15	cheD	17	Jacobine N-Oxide	13	N-Isobutyl-2,4,8,10,12-tetradecapentaenamide	19	Chlorophyllide a	16
N-Isobutyl-2,4,8,10,12-tetradecapentaenamide	20	Chlorophyllide a	13	N-Isobutyl-2,4,8,10,12-tetradecapentaenamide	23	appA	12	(5E,7E)-Undeca-2,5,7-trienedioylcarnitine	14	Bufuralol	12	K03791	27	nagZ	16	mdh	42	ACAT	15	Comfrey	16	Nummularine A	13	Dihydroceramide	19	Bufuralol	13
Dihydroceramide	20	N-Oleoyl Glutamine	13	Comfrey	23	Homovanillin	11	Baccatin III	13	sqr	12	N-Isobutyl-2,4,8,10,12-tetradecapentaenamide	26	malQ	15	accA	42	fumC	15	Acotiamide	15	N-Oleoyl Glutamine	13	Chlorophyllide a	19	Jacobine N-Oxide	13
(4R,5S,7R,11x)-11,12-Dihydroxy-1(10)-spirovetiven-2-one 12-glucoside	19	Baccatin III	13	Dihydroceramide	23	Glycyl-Arginine	11	6-O-Desmethyl-mycophenolic acid	13	Homovanillin	11	Dihydroceramide	26	Jacobine N-Oxide	14	metF	42	ppc	15	Bufuralol	14	Baccatin III	13	(4R,5S,7R,11x)-11,12-Dihydroxy-1(10)-spirovetiven-2-one 12-glucoside	16	N-Oleoyl Glutamine	13
GLUD1_2, gdhA	18	Salbutamol	13	Cytosine deoxyribonucleoside	23	Chlorophyllide a	11	Bufuralol	12	Glycyl-Arginine	11	Comfrey	25	Baccatin III	14	fumA	42	N-Oleoyl Glutamine	14	Jacobine N-Oxide	13	Salbutamol	13	czcS	15	Baccatin III	13
Acotiamide	17	(5E,7E)-Undeca-2,5,7-trienedioylcarnitine	13	Chlorophyllide a	22	Nummularine A	11	Nummularine A	12	Nummularine A	11	bxlA	25	Salbutamol	14	ALDO	42	folD	14	Chlorophyllide a	13	(5E,7E)-Undeca-2,5,7-trienedioylcarnitine	13	Acotiamide	14	Salbutamol	13
nrtA	17	6-O-Desmethyl-mycophenolic acid	13	(4R,5S,7R,11x)-11,12-Dihydroxy-1(10)-spirovetiven-2-one 12-glucoside	19	glpQ	11	Homovanillin	11	cysI	11	CES2	24	(5E,7E)-Undeca-2,5,7-trienedioylcarnitine	14	ppdK	41	Jacobine N-Oxide	13	N-Oleoyl Glutamine	13	6-O-Desmethyl-mycophenolic acid	13	Jacobine N-Oxide	13	(5E,7E)-Undeca-2,5,7-trienedioylcarnitine	13
Bufuralol	14	Nummularine A	12	Jacobine N-Oxide	13	Todatriol glucoside	10	(4R,5S,7R,11x)-11,12-Dihydroxy-1(10)-spirovetiven-2-one 12-glucoside	11	Todatriol glucoside	10	aceB	23	6-O-Desmethyl-mycophenolic acid	14	GAPDH	41	Chlorophyllide a	13	Baccatin III	13	Chlorophyllide a	12	N-Oleoyl Glutamine	13	6-O-Desmethyl-mycophenolic acid	13
nirA	14	Acotiamide	12	Acotiamide	13	Acotiamide	10	Glycyl-Arginine	11	Chlorophyllide a	10	qorA	23	bglB	14	K01963	41	Baccatin III	13	Salbutamol	13	Homovanillin	11	Baccatin III	13	(4R,5S,7R,11x)-11,12-Dihydroxy-1(10)-spirovetiven-2-one 12-glucoside	12
Jacobine N-Oxide	13	napA	12	N-Oleoyl Glutamine	13	Bufuralol	9	Acotiamide	11	(4R,5S,7R,11x)-11,12-Dihydroxy-1(10)-spirovetiven-2-one 12-glucoside	9	Chlorophyllide a	22	Bufuralol	13	Aucubin	40	Salbutamol	13	(5E,7E)-Undeca-2,5,7-trienedioylcarnitine	13	Glycyl-Arginine	11	Salbutamol	13	Homovanillin	11
Nummularine A	13	Homovanillin	11	Baccatin III	13	Epoxydocosapentaenoic acid	9	phsA	11	Epoxydocosapentaenoic acid	9	Bufuralol	20	N-Oleoyl Glutamine	13	tfrB	40	(5E,7E)-Undeca-2,5,7-trienedioylcarnitine	13	6-O-Desmethyl-mycophenolic acid	13	Epoxydocosapentaenoic acid	11	(5E,7E)-Undeca-2,5,7-trienedioylcarnitine	13	Glycyl-Arginine	11
N-Oleoyl Glutamine	13	Glycyl-Arginine	11	Salbutamol	13	K01139	9	Todatriol glucoside	10	Acotiamide	9	E1.10.3.1	18	CHS1	13	Prenyl glucoside	39	6-O-Desmethyl-mycophenolic acid	13	ppdC	13	Bufuralol	10	6-O-Desmethyl-mycophenolic acid	13	Nummularine A	11
Baccatin III	13	Epoxydocosapentaenoic acid	11	(5E,7E)-Undeca-2,5,7-trienedioylcarnitine	13	(4R,5S,7R,11x)-11,12-Dihydroxy-1(10)-spirovetiven-2-one 12-glucoside	8	sir	10	PGF2a ethanolamide	8	xylA	18	Todatriol glucoside	11	N-Isobutyl-2,4,8,10,12-tetradecapentaenamide	38	sucC	13	Homovanillin	11	Todatriol glucoside	10	Nummularine A	12	Acotiamide	11
Salbutamol	13	Todatriol glucoside	10	6-O-Desmethyl-mycophenolic acid	13	PGF2a ethanolamide	8	Epoxydocosapentaenoic acid	9	8-Hydroxy-5,6-octadienoic acid	8	XEG	17	Homovanillin	11	Comfrey	38	ppdK	13	(4R,5S,7R,11x)-11,12-Dihydroxy-1(10)-spirovetiven-2-one 12-glucoside	11	Epothilone D	10	Bufuralol	11	lspA	11
(5E,7E)-Undeca-2,5,7-trienedioylcarnitine	13	Senecionine N-Oxide	10	(-)-Wikstromol	12	8-Hydroxy-5,6-octadienoic acid	8	PGF2a ethanolamide	9	sir	8	(-)-Wikstromol	16	Glycyl-Arginine	11	Dihydroceramide	38	Glycyl-Arginine	12	Glycyl-Arginine	11	(4R,5S,7R,11x)-11,12-Dihydroxy-1(10)-spirovetiven-2-one 12-glucoside	9	Homovanillin	11	nmtR	11
6-O-Desmethyl-mycophenolic acid	13	8-Hydroxy-5,6-octadienoic acid	10	Homovanillin	11	Epothilone D	8	8-Hydroxy-5,6-octadienoic acid	8	Senecionine N-Oxide	7	NAGLU	16	Chlorophyllide a	11	korA	38	sucD	12	Nummularine A	11	PGF2a ethanolamide	9	Glycyl-Arginine	11	Todatriol glucoside	10
Homovanillin	11	Prazosin	9	Bufuralol	11	phoU	8	Senecionine N-Oxide	7	Epothilone D	7	(4R,5S,7R,11x)-11,12-Dihydroxy-1(10)-spirovetiven-2-one 12-glucoside	14	Nummularine A	11	korB	34	korA	12	Todatriol glucoside	10	ilvB3	9	(-)-Wikstromol	11	Epoxydocosapentaenoic acid	9
Glycyl-Arginine	11	Epothilone D	9	Glycyl-Arginine	11	Prazosin	7	Prazosin	6	Prazosin	6	Jacobine N-Oxide	13	8-Hydroxy-5,6-octadienoic acid	11	Chlorophyllide a	33	Homovanillin	11	Epoxydocosapentaenoic acid	10	8-Hydroxy-5,6-octadienoic acid	8	Todatriol glucoside	10	(-)-Wikstromol	9
Epothilone D	11	(4R,5S,7R,11x)-11,12-Dihydroxy-1(10)-spirovetiven-2-one 12-glucoside	8	Nummularine A	11	Senecionine N-Oxide	7	Epothilone D	6	ssuA	4	Nummularine A	13	(4R,5S,7R,11x)-11,12-Dihydroxy-1(10)-spirovetiven-2-one 12-glucoside	10	Cytosine deoxyribonucleoside	33	Nummularine A	11	Epothilone D	10	Senecionine N-Oxide	7	Epoxydocosapentaenoic acid	9	PGF2a ethanolamide	9
nrtB	11	PGF2a ethanolamide	8	Todatriol glucoside	10	pstS	7	ssuA	5	ssuB	4	N-Oleoyl Glutamine	13	Prazosin	10	mcmA1	30	icd	11	cheW	10	cheA	7	PGF2a ethanolamide	8	8-Hydroxy-5,6-octadienoic acid	9
Todatriol glucoside	10	nosZ	7	Epoxydocosapentaenoic acid	9	pstB	7	ssuB	5	(-)-Wikstromol	2	Baccatin III	13	Epoxydocosapentaenoic acid	10	icd	29	accA	11	Prazosin	9	Prazosin	6	8-Hydroxy-5,6-octadienoic acid	8	Epothilone D	9
Epoxydocosapentaenoic acid	9	gdhA	6	PGF2a ethanolamide	8	pstA	7	PAPSS	5	ssuC	2	Salbutamol	13	PGF2a ethanolamide	10	(4R,5S,7R,11x)-11,12-Dihydroxy-1(10)-spirovetiven-2-one 12-glucoside	28	Bufuralol	10	PGF2a ethanolamide	9	cheD	4	Epothilone D	8	Prazosin	7
PGF2a ethanolamide	9	glnA	4	8-Hydroxy-5,6-octadienoic acid	8	(-)-Wikstromol	6	(-)-Wikstromol	4	sor	1	(5E,7E)-Undeca-2,5,7-trienedioylcarnitine	13	Epothilone D	10	K14469	28	Todatriol glucoside	10	8-Hydroxy-5,6-octadienoic acid	9	(-)-Wikstromol	3	Senecionine N-Oxide	7	Senecionine N-Oxide	7
8-Hydroxy-5,6-octadienoic acid	9	nrtC	3	Senecionine N-Oxide	7	pyk	6	ssuC	3			6-O-Desmethyl-mycophenolic acid	13	bxlA	10	Bufuralol	20	cdhD	10	Senecionine N-Oxide	7	cheC	3	Prazosin	6	czcC	3
Prazosin	7	(-)-Wikstromol	2	Epothilone D	7	ugpB	6	tmoF	3			Acotiamide	12	bglX	9	Acotiamide	20	(4R,5S,7R,11x)-11,12-Dihydroxy-1(10)-spirovetiven-2-one 12-glucoside	9	patA	6	patA	2	chrA	4	zraS	2
Senecionine N-Oxide	7	nirA	2	Prazosin	6	pstC	3	msmB	2			bglX	12	Senecionine N-Oxide	8	frdA	20	Epoxydocosapentaenoic acid	9	(-)-Wikstromol	3	cheW	1	nccX	4	fieF	1
(-)-Wikstromol	5	nrtA	1	PHO	5	ppnK	2	asrB	1			Homovanillin	11	Acotiamide	8	(-)-Wikstromol	14	Senecionine N-Oxide	9	patA	2			zraS	1	nccX	1
nrtD	5			gcd	3							Glycyl-Arginine	11	glgP	8	ccsA	14	Acotiamide	9	flhF	1			czrA	1
												Todatriol glucoside	10	yesX	7	Jacobine N-Oxide	13	PGF2a ethanolamide	9
												Epoxydocosapentaenoic acid	10	(-)-Wikstromol	3	N-Oleoyl Glutamine	13	mcmA1	9
												8-Hydroxy-5,6-octadienoic acid	10	treS	3	Baccatin III	13	8-Hydroxy-5,6-octadienoic acid	8
												Epothilone D	9	IMS	2	Salbutamol	13	Epothilone D	8
												Senecionine N-Oxide	8	E1.11.1.5	2	(5E,7E)-Undeca-2,5,7-trienedioylcarnitine	13	Prazosin	7
												PGF2a ethanolamide	8	pelC	2	6-O-Desmethyl-mycophenolic acid	13	(-)-Wikstromol	7
												Prazosin	7	PIGL	2	Nummularine A	12	korB	7
												E3.2.1.6	7	CRYZ	1	Homovanillin	11	accD	6
												K16153	6	CES1	1	Glycyl-Arginine	11	cdhE	4
												E1.11.1.5	4			Todatriol glucoside	10	K15038	4
												lplD	2			Epothilone D	10	fdhB	2
												E3.2.1.15	1			smtB	10
																Epoxydocosapentaenoic acid	9
																PGF2a ethanolamide	8
																8-Hydroxy-5,6-octadienoic acid	8
																Senecionine N-Oxide	7
																Prazosin	6
																cdhD	6
																cdhE	6
